# Supplementary material
Source: PubMed Central journal article supplement (PMC5008460)
Supplement: NIHMS69042-supplement-Supplementary_Tables_and_Notes.pdf [file NIHMS69042-supplement-Supplementary_Tables_and_Notes.pdf]

## Supplementary Tables

**Supplementary Table 1. Second-stage replication with the UKPDS and meta-analysis.** Two multiple linear regression models of HbA1c reduction with (shaded) or without (non-shaded) adjustment for baseline HbA1c were used to evaluate the replication. Only rs8192675 showed nominally significant replication in the model without baseline adjustment.

| SNP              | Gene          | Allele   | GWAS Screening and First-Stage Replication |              |                 |              |                 | Second-Stage Replication |              |                |              |                | Meta-analysis up to the Second Stage |              |                 |              |                 | Rep       |
|------------------|---------------|----------|--------------------------------------------|--------------|-----------------|--------------|-----------------|--------------------------|--------------|----------------|--------------|----------------|--------------------------------------|--------------|-----------------|--------------|-----------------|-----------|
|                  |               |          | Adjusted                                   |              | Non-Adjusted    |              | Adjusted        |                          | Non-Adjusted |                | Adjusted     |                | Non-Adjusted                         |              |                 |              |                 |           |
|                  |               |          | N                                          | BETA         | P               | BETA         | P               | N                        | BETA         | P              | BETA         | P              | N                                    | BETA         | P               | BETA         | P               |           |
| rs3013105        | LRRC38        | C        | 2294                                       | 0.105        | 0.000272        | 0.114        | 0.006599        | 1156                     | -0.002       | 0.9671         | -0.058       | 0.386          | 3450                                 | 0.083        | 0.00123         | 0.066        | 0.064009        | +         |
| rs41404544       | KCNA2         | C        | 2704                                       | -0.218       | 8.81E-05        | -0.188       | 0.02003         | 1177                     | -0.166       | 0.1465         | -0.096       | 0.481          | 3881                                 | -0.208       | 3.12E-05        | -0.164       | 0.018231        | --        |
| rs34053484       | ALCAM         | C        | 2701                                       | -0.144       | 7.37E-08        | -0.187       | 1.49E-06        | 1166                     | 0.057        | 0.3196         | 0.105        | 0.127          | 3867                                 | -0.108       | 7.35E-06        | -0.117       | 5.55E-04        | +-        |
| rs1828652        | PLSCR4        | T        | 2298                                       | 0.082        | 0.004901        | 0.082        | 0.05232         | 1125                     | -0.024       | 0.6746         | -0.059       | 0.3773         | 3423                                 | 0.060        | 0.021366        | 0.042        | 0.245015        | +-        |
| <b>rs8192675</b> | <b>SLC2A2</b> | <b>C</b> | <b>2296</b>                                | <b>0.131</b> | <b>4.68E-05</b> | <b>0.224</b> | <b>1.42E-06</b> | <b>1160</b>              | <b>0.112</b> | <b>0.06138</b> | <b>0.167</b> | <b>0.02022</b> | <b>3456</b>                          | <b>0.127</b> | <b>7.58E-06</b> | <b>0.207</b> | <b>1.04E-07</b> | <b>++</b> |
| rs1011691        | LOC401134     | G        | 2635                                       | 0.107        | 0.000296        | 0.110        | 0.01005         | 1190                     | 0.037        | 0.5619         | 0.047        | 0.5366         | 3825                                 | 0.094        | 4.09E-04        | 0.095        | 0.010775        | ++        |
| rs6867983        | C5orf67       | T        | 2296                                       | 0.135        | 0.000842        | 0.226        | 0.000102        | 1170                     | 0.074        | 0.3429         | 0.071        | 0.4423         | 3466                                 | 0.122        | 6.66E-04        | 0.182        | 2.13E-04        | ++        |
| rs3843467        | C5orf67       | T        | 2301                                       | 0.116        | 0.000945        | 0.191        | 0.000158        | 1183                     | 0.039        | 0.5647         | 0.065        | 0.4196         | 3484                                 | 0.100        | 0.001356        | 0.156        | 2.77E-04        | ++        |
| rs9497852        | SAMD5         | G        | 2298                                       | -0.118       | 0.007368        | -0.037       | 0.5569          | 1163                     | 0.118        | 0.1562         | 0.102        | 0.3058         | 3461                                 | -0.066       | 0.087231        | 0.003        | 0.954565        | +-        |
| rs11231159       | EML3/MTA2     | T        | 2299                                       | -0.139       | 0.001986        | -0.192       | 0.003022        | 1205                     | 0.018        | 0.8321         | 0.016        | 0.8729         | 3504                                 | -0.104       | 0.008516        | -0.131       | 0.016024        | +-        |
| rs1957572        | RAD51B        | C        | 2684                                       | 0.140        | 0.003691        | 0.117        | 0.09534         | 1205                     | 0.031        | 0.7606         | 0.054        | 0.6546         | 3889                                 | 0.120        | 0.005879        | 0.101        | 0.095527        | ++        |
| rs4787778        | HS3ST4        | G        | 2709                                       | -0.113       | 3.83E-05        | -0.115       | 0.003801        | 1006                     | 0.072        | 0.1872         | 0.110        | 0.08865        | 3715                                 | -0.075       | 0.002022        | -0.053       | 0.117235        | +-        |

**Supplementary Table 2. MetGen cohorts**

| Cohort               | Ethnicity         | Citation (PUBMED)            | Number Subjects | Genotyping     |             |           |       | Clinical Covariates |                           |                 | Description of Cohort                                                    |
|----------------------|-------------------|------------------------------|-----------------|----------------|-------------|-----------|-------|---------------------|---------------------------|-----------------|--------------------------------------------------------------------------|
|                      |                   |                              |                 | Platform       | C-frequency | Call Rate | HWE-p | Adherence           | EGFR/Creatinine Clearance | Treatment Group |                                                                          |
| ACCORD               | European American | 18539917                     | 172             | Array          | 25%         | 100%      | NA    | N                   | Y                         | Y               | Randomised trial of intensive (target A1c 6%) vs conventional (A1c 7-8%) |
| DCS                  | European          | 22453232                     | 748             | TaqMan         | 29%         | 100%      | 0.92  | N                   | Y                         | Y               | Population, observational, EMR-linked                                    |
| GoDARTS              | European          | 21186350                     | 3103            | Array & Taqman | 27%         | 100%      | 0.08  | Y                   | Y                         | Y               | Population, observational, EMR-linked                                    |
| RIGA                 | European          | 22735389                     | 74              | Taqman         | 20%         | 99%       | 0.72  | N                   | Y                         | N               | Retrospective pharmacogenetic study                                      |
| Rotterdam            | European          | 19228809                     | 325             | Array          | 30%         | 100%      | NA    | Y                   | Y                         | Y               | Population, observational, EMR-linked                                    |
| Kosice               | European          | 22882994                     | 148             | Taqman         | 28%         | 100%      | 0.88  | Y                   | Y                         | N               | Retrospective pharmacogenetic study                                      |
| UKPDS                | European          | 9742977                      | 1223            | Taqman         | 30%         | 82%       | 0.12  | N                   | Y                         | Y               | RCT, metformin and sulfonylureas                                         |
| Sarajevo             | European          | NA                           | 88              | Taqman         | 35%         | 100%      | 0.48  | N                   | Y                         | N               | Population, observational, prospective                                   |
| PMT1-EU              | European American | 24853734, 21956618, 23267855 | 292             | Array          | 30%         | 100%      | NA    | N                   | Y                         | Y               | Population, observational, EMR-linked                                    |
| PMT2-EU <sup>2</sup> | European American | 21565264, 26092716, 26092718 | 4384            | Array          | 29%         | 100%      | NA    | Y                   | Y                         | Y               | Population, observational, EMR-linked                                    |
| PMT1-AF <sup>1</sup> | African American  | NA                           | 732             | Array          | 68%         | 100%      | NA    | N                   | Y                         | Y               | Population, observational, EMR-linked                                    |
| PMT2-AF <sup>2</sup> | African American  | 21903159                     | 369             | Array          | 70%         | 100%      | NA    | Y                   | Y                         | Y               | Population, observational, EMR-linked                                    |
| PMT2-AS <sup>2</sup> | Asian American    | 21903159                     | 627             | Array          | 31%         | 100%      | NA    | Y                   | Y                         | Y               | Population, observational, EMR-linked                                    |

**Supplementary Table 2. MetGen cohorts (Continued)**

|                       |                   |          |      |        |     |      |      |   |   |   |                                                                                        |
|-----------------------|-------------------|----------|------|--------|-----|------|------|---|---|---|----------------------------------------------------------------------------------------|
| PMT2-LA <sup>2</sup>  | Latino            | 21903159 | 743  | Array  | 24% | 100% | NA   | Y | Y | Y | Population, observational, EMR-linked                                                  |
| SAPPHIRE <sup>3</sup> | African American  | 24937318 | 95   | Array  | 75% | 100% | 0.40 | Y | Y | N | Population, observational, EMR-linked                                                  |
| DPP                   | European American | 20682687 | 1502 | Array  | 30% | 100% | 0.31 | Y | Y | Y | IGT randomised to metformin or intensive exercise and followed up to incident diabetes |
| HOME                  | European          | 19307526 | 163  | Taqman | 29% | 100% | 0.17 | Y | Y | N | RCT, metformin and insulin                                                             |

Note<sup>1</sup>: Participants from PMT1-AF cohort were collected from Kaiser Permanente at Northern California and South East Georgia. This is a funded project to the Pharmacogenomics of Membrane Transporters (PMT) by the National Institute of Health (NIH) Pharmacogenomics Research Network (PGRN). The goal of the study was to identify genetic determinants of response to metformin in African Americans. This is a cohort study where the participants are African American adult with Type 2 diabetes on metformin with baseline HbA1c and treatment HbA1c and was identified through EMR. The identified participants were called back for blood samples for genotyping using Illumina OmniExpressExome Chip. For this replication study in multi-ethnic cohort, we imputed rs8192675 using IMPUTE2 and 1000 Genome Phase I.

Note<sup>2</sup>: As described in the Method section, participants from the PMT2 cohort were selected from the Genetic Epidemiology Research on Adult Health and Aging (GERA) cohort, a subsample of the Kaiser Permanente Research Program on Genes, Environment, and Health (RPEGH). The criteria for selecting the participants from GERA cohort have been described previously (24853734, 21956618, 23267855). A detailed description of the cohort and study design can also be found in dbGAP (dbGaP Study Accession: phs000674.v1.p1). Genotyping of the different ethnic groups in PMT2 were performed using the methods described in the publication provided in the table. We imputed rs8192675 using IMPUTE2 and 1000 Genome Phase I.

Note<sup>3</sup>: This cohort was established as an asthma pharmacogenomics study. However, by virtue of detailed medical record data on this cohort, metformin treatment and response could also be assessed. The methods for determining metformin exposure and response in this patient population have been described elsewhere (24921653).

URL: PGRN, <http://dbts.ucsf.edu/pgrn-cgm/projects.php?page=endocrinology>

**Supplementary Table 3. Association between rs8192675 and alternative measures of metformin efficacy in MetGen.** In HOME study of patients using metformin as add on treatment to insulin, the outcome of the change in daily dose of insulin (unit) was modelled in linear regression. In the DPP study of metformin prevention in pre-diabetes patients, the outcome of diabetes incidence was modelled with proportional hazard Cox regression.

| Study | Allele | N   | Effect Size | 95% CI       | P     |
|-------|--------|-----|-------------|--------------|-------|
| HOME  | C      | 163 | 0.08        | [-0.02,0.18] | 0.286 |
| DPP   | C      | 511 | 0.97        | [0.72,1.31]  | 0.832 |

**Supplementary Table 4. Pharmacogenetic impact of rs8192675 on glycaemic response to metformin in participants of non-European ancestries.** The frequency and the effect size estimates were all reported for the C-allele. HbA1c was measured in percentage.

| Ethnic groups                  | n    | Frequency | Baseline Adjusted |       |       | Baseline Non-Adjusted |       |       |
|--------------------------------|------|-----------|-------------------|-------|-------|-----------------------|-------|-------|
|                                |      |           | Beta              | SE    | p     | Beta                  | SE    | p     |
| PMT2-AS<br>(Asian American)    | 627  | 31%       | 0.12              | 0.049 | 0.014 | 0.124                 | 0.093 | 0.186 |
| PMT2-LA<br>(Latino)            | 743  | 24%       | 0.114             | 0.06  | 0.059 | 0.14                  | 0.102 | 0.168 |
| PMT2-AF<br>(African American)  | 369  | 68%       | 0.037             | 0.093 | 0.694 | 0.238                 | 0.165 | 0.15  |
| PMT1-AF<br>(African American)  | 732  | 70%       | 0.031             | 0.047 | 0.499 | 0.183                 | 0.11  | 0.096 |
| SAPPHIRE<br>(African American) | 95   | 75%       | -0.027            | 0.190 | 0.887 | 0.024                 | 0.251 | 0.924 |
| Combined                       | 2566 | --        | 0.077             | 0.028 | 0.006 | 0.150                 | 0.054 | 0.005 |

**Supplementary Table 5. Association between rs8192675 and response to sulfonylureas in patients with type 2 diabetes.** The upper table shows the additive allelic effect (standard error) of the C-allele on HbA1c level or HbA1c reduction in each of the three cohorts. HbA1c was measured in percentage. The lower table shows the fixed-effect inverse-variance-weighted meta-analysis.

|                  | n    | Baseline HbA1c | On-treatment HbA1c | HbA1c Reduction | Baseline Adjusted HbA1c Reduction |
|------------------|------|----------------|--------------------|-----------------|-----------------------------------|
| GoDARTS          | 1859 | 0.10 (0.05)    | 0.02 (0.04)        | 0.08 (0.05)     | 0 (0.04)                          |
| UKPDS            | 387  | 0.15 (0.09)    | 0.43 (0.11)        | -0.27 (0.12)    | -0.39 (0.10)                      |
| DCS              | 408  | 0.36 (0.11)    | 0.21 (0.08)        | 0.15 (0.13)     | -0.16 (0.08)                      |
| Combined Effect  | 2654 | 0.15 (0.04)    | 0.09 (0.03)        | 0.04 (0.05)     | -0.06 (0.03)                      |
| Combined P-value | --   | 3.1E-04        | 0.006              | 0.44            | 0.04                              |
| Meta-Phet        | --   | 0.12           | 6.2E-4             | 0.02            | 6.1E-4                            |

**Supplementary Table 6. Pharmacogenetic impact of rs8192675 after adjusting for BMI.**

The percentage of obese patients is 54.8% in MetGen cohorts where BMI data are available. BMI adjusted analyses from the Rotterdam and PMT1-EU studies are not available. BMI data are only partially available for the PMT2-EU samples.

| Study                | #Obese      | #Total      | Baseline adjusted |              | Baseline non-adjusted |              |
|----------------------|-------------|-------------|-------------------|--------------|-----------------------|--------------|
|                      |             |             | Beta              | SE           | Beta                  | SE           |
| ACCORD               | 116         | 172         | -0.034            | 0.114        | -0.037                | 0.064        |
| DCS                  | 357         | 748         | 0.040             | 0.039        | 0.207                 | 0.075        |
| GoDARTS              | 1727        | 3103        | 0.112             | 0.027        | 0.200                 | 0.040        |
| Kosice               | 85          | 148         | 0.107             | 0.097        | 0.161                 | 0.135        |
| PMT2-EU              | 1367        | 2353        | 0.072             | 0.025        | 0.179                 | 0.045        |
| RIGA                 | 73          | 74          | -0.363            | 0.140        | -0.267                | 0.370        |
| Sarajevo             | 50          | 88          | 0.051             | 0.111        | -0.164                | 0.188        |
| UKPDS                | 557         | 1223        | 0.138             | 0.060        | 0.200                 | 0.071        |
| <b>Meta-analysis</b> | <b>4332</b> | <b>7909</b> | <b>0.078</b>      | <b>0.015</b> | <b>0.155</b>          | <b>0.024</b> |

**Supplementary Table 7. Association between rs8192675 and *SLC2A2* expression in other tissues.** Following the evidence that rs8192675 is a genomewide cis-eQTL for *SLC2A2*, we examined whether the variant (or its proxies) are associated with *SLC2A2* expression in other tissues. A significance threshold of  $p < 0.05$  was used to draw supportive evidence. The GTEx data were based on data release V6. The direction of effect refers to the C-allele at rs8192675 or its linked alleles at the proxy SNPs (NS: not significant).

| Tissue                           | P      | Direction of Effect | n   | Source         |
|----------------------------------|--------|---------------------|-----|----------------|
| Cells - Transformed fibroblasts  | 0.0006 | LOW                 | 271 | GTEx           |
| Liver                            | 0.13   | NS                  | 97  | GTEx           |
| Pancreas                         | 0.74   | NS                  | 149 | GTEx           |
| Pituitary                        | 0.92   | NS                  | 87  | GTEx           |
| Small Intestine - Terminal Ileum | 0.9    | NS                  | 77  | GTEx           |
| Testis                           | 0.98   | NS                  | 157 | GTEx           |
| Whole Blood                      | 0.23   | NS                  | 338 | GTEx           |
| Islet                            | 0.003  | LOW                 | 118 | PMID: 26624892 |
| Intestine                        | 0.007  | LOW                 | 173 | PMID: 23474282 |
| Kidney                           | 0.03   | LOW                 | 44  | MetGen data    |



**Supplementary Table 8. Association between rs8192675 and *SLC2A2* expression in the liver.** Within four liver eQTL data sets, linear regression was used to model *SLC2A2* expression levels with adjustment of relevant covariates. Results from the four liver datasets were combined by meta-analysis. *SLC2A2* expression level was determined using microarray and only include patients of European ancestry. The data was coded such that a negative beta means that as the number of minor C-allele increases there is decrease in *SLC2A2* expression.

| Dataset | n    | Expression                                                                             | Genotyping                                                              | P-value              | Corrected P-value | Beta  | PMID        |
|---------|------|----------------------------------------------------------------------------------------|-------------------------------------------------------------------------|----------------------|-------------------|-------|-------------|
| Set 1   | 149  | Illumina Human Whole Genome-6 v2.0 Expression BeadChip (NCBI GEO accession: GSE39036)  | HumanHap300-Duo v2.0 Genotyping BeadChip (NCBI GEO accession: GSE32504) | 0.013                | 0.211             | -0.23 | 22006096    |
| Set 2   | 168  | Agilent-014850 Whole Human Genome 4x44K gene expression (NCBI GEO accession: GSE25935) | Illumina Human610-Quad v1.0 BeadChip (NCBI GEO accession: GSE26105)     | 1.6x10 <sup>-4</sup> | 0.014             | -0.19 | 21637794    |
| Set 3   | 326  | Agilent Technologies (NCBI GEO accession: GSE9588)                                     | Affymetrix GeneChip Human Mapping 500k genotyping microarray            | 0.175                | 0.627             | -0.05 | 18462017    |
| Set 4   | 583  | Agilent Technologies (unpublished data)                                                | HumanHap 650Y                                                           | 3.2E-10              | 1.3E-8            | -0.19 | Unpublished |
| Meta    | 1226 |                                                                                        |                                                                         | 1.1E-13              | 4.2E-12           |       |             |

**Supplementary Table 9.** Primers used to clone the genomic region (chr3:170724251-170727543) encompass the *SLC2A2* variant, rs8192675 (chr3:170724883).

| Primer                                                                | Note                                                                                                                                                                            |
|-----------------------------------------------------------------------|---------------------------------------------------------------------------------------------------------------------------------------------------------------------------------|
| Forward (+ strand):<br>GCTCGCTAGC <u>CTCGAGG</u> CAACCAGATAGAATAATAC  | The genomic region cloned into XhoI and BgIII digested pGL4.23 using the Infusion HD cloning system (Clontech). The underlined region is the digestion site for XhoI and BgIII. |
| Reverse (+ strand):<br>CGCCGAGGCC <u>CAGATCT</u> GGTTCTCGTCCATGGCAATG |                                                                                                                                                                                 |

# Supplementary Notes

## Study Acknowledgements

**GoDARTS:** This study was partially funded by the Diabetes UK grant (10/0004063). We are grateful to all the participants in this study, the general practitioners, the Scottish School of Primary Care for their help in recruiting the participants, and to the whole team, which includes interviewers, computer and laboratory technicians, clerical workers, research scientists, volunteers, managers, receptionists, and nurses. The study complies with the Declaration of Helsinki. We acknowledge the support of the Health Informatics Centre, University of Dundee for managing and supplying the anonymised data and NHS Tayside, the original data owner. This study was partially funded by the Diabetes UK grant (10/0004063). The Wellcome Trust United Kingdom Type 2 Diabetes Case Control Collection (GoDARTS) was funded by The Wellcome Trust (084727/Z/08/Z, 085475/Z/08/Z, 085475/B/08/Z) and as part of the EU IMI-SUMMIT program. ERP holds a Wellcome Trust New Investigator Award (102820/Z/13/Z).

**UKPDS:** The work involved in this study was supported by the Wellcome Trust 090532, 098381; IMI DIRECT; NIDDK DK085545; Diabetes UK: 10/0004063; M.McC is a Wellcome Trust Senior Investigator, and an NIHR Senior Investigator. RRH is an NIHR Senior Investigator.

**ACCORD:** Research reported in this publication was supported by the National Heart, Lung, And Blood Institute of the National Institutes of Health under Award Number R01HL110380. The content is solely the responsibility of the authors and does not necessarily represent the official views of the National Institutes of Health. The authors would like to acknowledge the contribution of the ACCORD investigators.

**DPP:** The NIDDK of the National Institutes of Health provided funding to the clinical centers and the Coordinating Center for the design and conduct of the study; collection, management, analysis, and interpretation of the data. The Southwestern American Indian Centers were supported directly by the NIDDK and the Indian Health Service. The General Clinical Research Center Program, National Center for Research Resources supported data collection at many of the clinical centers. Funding for data collection and participant support was also provided by the Office of Research on Minority Health, the National Institute of Child Health and Human Development, the National Institute on Aging, the Centers for Disease Control and Prevention, Office of Research on Women's Health, the Department of Veterans Affairs, and the American Diabetes Association. Bristol-Myers Squibb and Parke-Davis provided medication. This research was also supported, in part, by the intramural research program of the NIDDK. LifeScan Inc., Health O Meter, Hoechst Marion Roussel, Inc., Merck-Medco Managed Care, Inc., Merck and Co., Nike Sports Marketing, Slim Fast Foods Co., and Quaker Oats Co. donated materials, equipment, or medicines for concomitant conditions. McKesson BioServices Corp., Matthews Media Group, Inc., and the Henry M. Jackson Foundation provided support services under subcontract with the Coordinating Center. The opinions expressed are those of the investigators and do not necessarily reflect the views of the Indian Health Service or other funding agencies. A complete list of Centers, investigators, and staff can be found in the online Appendix. The investigators gratefully acknowledge the commitment and dedication of all participants in the DPP, without whom this work would not have been possible. This work was funded by R01 DK072041 to JCF and KAJ.

**DCS:** This project is supported by the Diabetes Care System West-Friesland, the Netherlands. The DCS cohort was partially funded by the Netherlands Organisation for Health Research and Development (Priority Medicines Elderly Programme 113102006) and IMI-DIRECT.

**RIGA:** The OPTIMED study which provided the data for this analysis was supported by State Research Programme "Development of advanced prevention strategies, treatment, diagnostic tools and methods, biomedical technologies for improving public health" and the National Research Programme "Biomedicine for Public Health" (BIOMEDICINE) and European Social Fund within the project "Support for Doctoral Studies at University of Latvia". DNA samples were provided by Genome Database of Latvian Population.

**Kosice:** IT was supported by research grant APVV-0134-11 and VEGA 1/0389/14 from the Ministry of Education, Slovakia. MJ was supported by research grants VEGA 1/0389/14 from the Ministry of Education, Slovakia.

**SAPPHIRE:** Funding for the SAPPHIRE cohort was provided by the American Asthma Foundation, the Fund for Henry Ford Hospital, and the following institutes of the U.S. National Institutes of Health - National Heart Lung and Blood Institute (R01HL118267), the National Institute of Allergy and Infectious Diseases (R01AI079139), and the National Institute of Diabetes and Digestive and Kidney Diseases (R01DK064695).

**Sarajevo:** The study was supported by grants received from the Council of Ministers/ Ministry of Civil Affairs of Bosnia and Herzegovina and the Federal Ministry for Education and Science of Bosnia and Herzegovina awarded to S.S., and by a European Foundation for the Study of Diabetes Albert Renold Travel Fellowship to T.D.

**PMT1&PMT2:** The study was supported in part by grants from the NIH (U19GM061390 and R01GM117163). Genotyping of the PMT1 cohort was supported by a collaboration between the NIH Pharmacogenomics Research Network (PGRN) and the RIKEN Center for Integrative Medical Sciences, PGRN-RIKEN Global Alliance. The genotyping of the PMT2 cohort (also known as GERA cohort) was supported by grant RC2 AG036607 from the National Institutes of Health; development of the GERA cohort was supported by grants from the Robert Wood Johnson Foundation, the Ellison Medical Foundation, the Wayne and Gladys Valley Foundation, and Kaiser Permanente. We also thank the Kaiser Permanente RPGEH for providing the phenotype and genotype data and the computational time. We would like to acknowledge all the clinical staff involved in recruitment and collection of data for PMT1 and PMT2 cohort.

## Acknowledged consortia members and affiliations

### The Metformin Genetics (MetGen) Consortium:

Ewan R. Pearson<sup>1</sup>, Kathleen M. Giacomini<sup>2,3</sup>, Jose C. Florez<sup>4,5,6</sup>, Michael J. Wagner<sup>7</sup>, Mattijs Out<sup>8,9</sup>, L. Keoki Williams<sup>10</sup>, Sabina Semiz<sup>11,12</sup>, Ivan Tkáč<sup>13</sup>, Janis Klovins<sup>14,15</sup>, Bruno H. Stricker<sup>16</sup>, Leen M. 't Hart<sup>17,18,19</sup>, Torben Hansen<sup>20</sup>, Meg Ehm<sup>21</sup>, Dawn M. Waterworth<sup>22</sup>, Monique M. Hedderson<sup>23</sup>, Rury R. Holman<sup>24</sup>, Mark I McCarthy<sup>25</sup>

1. *School of Medicine, University of Dundee, Dundee, UK*
2. *Department of Bioengineering and Therapeutic Sciences, University of California, San Francisco, San Francisco, California, USA.*
3. *Institute for Human Genetics, University of California, San Francisco, San Francisco, California, USA*
4. *Center for Human Genetic Research and Diabetes Unit, Massachusetts General Hospital, Boston, MA 02114, USA*
5. *Program in Medical and Population Genetics, Broad Institute, Cambridge, MA 02142, USA*
6. *Department of Medicine, Harvard Medical School, Boston, MA 02115, USA*
7. *Center for Pharmacogenomics and Individualized Therapy, University of North Carolina at Chapel Hill, Chapel Hill, NC, USA*
8. *Treant Zorggroep, Location Bethesda, Hoogeveen, The Netherlands*
9. *Bethesda Diabetes Research Centre, Hoogeveen, The Netherlands*
10. *Center for Health Policy and Health Services Research, Henry Ford Health System, Detroit, MI, USA*
11. *Faculty of Engineering and Natural Sciences, International University of Sarajevo, Bosnia and Herzegovina*
12. *Faculty of Pharmacy, University of Sarajevo, Bosnia and Herzegovina*
13. *Faculty of Medicine, Šafárik University, Košice, Slovakia*
14. *Latvian Genome Data Base (LGDB), Riga, Latvia*
15. *Latvian Biomedical Research and Study centre, Riga, Latvia*
16. *department of Epidemiology, Erasmus Medical Center, PO Box 2040, 3000 CA Rotterdam, the Netherlands*
17. *Dept. of Molecular Cell Biology, Leiden University Medical Center, Leiden, The Netherlands*
18. *Dept. of Molecular Epidemiology, Leiden University Medical Center, Leiden, The Netherlands*
19. *Dept. of Epidemiology and Biostatistics, EMGO+ Institute for Health and Care Research, VU University Medical Center, Amsterdam, The Netherlands*
20. *The Novo Nordisk Foundation Center for Basic Metabolic Research, Faculty of Health and Medical Sciences, University of Copenhagen, Copenhagen, Denmark*
21. *GlaxoSmithKline, Quantitative Sciences, Research Triangle Park, NC, USA*
22. *GlaxoSmithKline, Philadelphia, PA, USA*
23. *Division of Research, Kaiser Permanente Northern California, Oakland, California, USA.*
24. *Diabetes Trials Unit, OCDEM, Radcliffe Dept of Medicine, Churchill Hospital, Old Road, Oxford, OX3 7LJ, UK*
25. *OCDEM, Radcliffe Dept of Medicine, Churchill Hospital, Old Road, Oxford, OX3 7LJ, UK*

## DPP Research Group Investigators (Updated- March 2013)

|                                                                                                                                                                                                                                                                                                                                                                                                                                                                                                                                                                                                     |                                                                                                                                                                                                                                                                                                                                                                                                                                                                                                                                                   |
|-----------------------------------------------------------------------------------------------------------------------------------------------------------------------------------------------------------------------------------------------------------------------------------------------------------------------------------------------------------------------------------------------------------------------------------------------------------------------------------------------------------------------------------------------------------------------------------------------------|---------------------------------------------------------------------------------------------------------------------------------------------------------------------------------------------------------------------------------------------------------------------------------------------------------------------------------------------------------------------------------------------------------------------------------------------------------------------------------------------------------------------------------------------------|
| <p><b><u>Pennington Biomedical Research Center (Baton Rouge, LA)</u></b></p>                                                                                                                                                                                                                                                                                                                                                                                                                                                                                                                        | <p>Paul Cassanova-Romero, MD<br/>Hermes J. Florez, MD</p>                                                                                                                                                                                                                                                                                                                                                                                                                                                                                         |
| <p>George A. Bray, MD*<br/>Iris W. Culbert, BSN, RN, CCRC**<br/>Catherine M. Champagne, PhD, RD<br/>Barbara Eberhardt, RD, LDN<br/>Frank Greenway, MD<br/>Fonda G. Guillory, LPN<br/>April A. Herbert, RD<br/>Michael L. Jeffers, LPN<br/>Betty M. Kennedy, MPA<br/>Jennifer C. Lovejoy, PhD<br/>Laura H. Morris, BS<br/>Lee E. Melancon, BA, BS<br/>Donna Ryan, MD<br/>Deborah A. Sanford, LPN<br/>Kenneth G. Smith, BS, MT<br/>Lisa L. Smith, BS<br/>Julia A. St.Amant, RTR<br/>Richard T. Tulley, PhD<br/>Paula C. Vicknair, MS, RD<br/>Donald Williamson, PhD<br/>Jeffery J. Zachwieja, PhD</p> | <p>Anna Giannella, RD, MS<br/>Lascelles Kirby, MS<br/>Carmen Larreal<br/>Valerie McLymont, RN<br/>Jadell Mendez<br/>Juliet Ojito, RN<br/>Arlette Perry, PhD<br/>Patrice Saab, PhD</p>                                                                                                                                                                                                                                                                                                                                                             |
| <p><b><u>University of Chicago (Chicago, IL)</u></b></p>                                                                                                                                                                                                                                                                                                                                                                                                                                                                                                                                            | <p><b><u>The University of Texas Health Science Center (San Antonio, TX)</u></b></p>                                                                                                                                                                                                                                                                                                                                                                                                                                                              |
| <p>Kenneth S. Polonsky, MD*<br/>Janet Tobian, MD, PhD*<br/>David Ehrmann, MD*<br/>Margaret J. Matulik, RN, BSN**<br/>Bart Clark, MD<br/>Kirsten Czech, MS<br/>Catherine DeSandre, BA<br/>Ruthanne Hilbrich, RD<br/>Wylie McNabb, EdD<br/>Ann R. Semenske, MS, RD</p>                                                                                                                                                                                                                                                                                                                                | <p>Steven M. Haffner, MD, MPH*<br/>Maria G. Montez, RN, MSHP, CDE**<br/>Carlos Lorenzo, MD, PhD<br/>Arlene Martinez, RN, BSN, CDE</p>                                                                                                                                                                                                                                                                                                                                                                                                             |
| <p><b><u>Jefferson Medical College (Philadelphia, PA)</u></b></p>                                                                                                                                                                                                                                                                                                                                                                                                                                                                                                                                   | <p><b><u>University of Colorado (Denver, CO)</u></b></p>                                                                                                                                                                                                                                                                                                                                                                                                                                                                                          |
| <p>Jose F. Caro, MD*<br/>Pamela G. Watson, RN, ScD*<br/>Barry J. Goldstein, MD, PhD*<br/>Kellie A. Smith, RN, MSN**<br/>Jewel Mendoza, RN, BSN**<br/>Renee Liberoni, MPH<br/>Constance Pepe, MS, RD<br/>John Spandorfer, MD</p>                                                                                                                                                                                                                                                                                                                                                                     | <p>Richard F. Hamman, MD, DrPH*<br/>Patricia V. Nash, MS**<br/>Lisa Testaverde, MS**<br/>Denise R. Anderson, RN, BSN<br/>Larry B. Ballonoff, MD<br/>Alexis Bouffard, MA,<br/>B. Ned Calonge, MD, MPH<br/>Lynne Delve<br/>Martha Farago, RN<br/>James O. Hill, PhD<br/>Shelley R. Hoyer, BS<br/>Bonnie T. Jortberg, MS, RD, CDE<br/>Dione Lenz, RN, BSN<br/>Marsha Miller, MS, RD<br/>David W. Price, MD<br/>Judith G. Regensteiner, PhD<br/>Helen Seagle, MS, RD<br/>Carissa M. Smith, BS<br/>Sheila C. Steinke, MS<br/>Brent VanDorsten, PhD</p> |
| <p><b><u>University of Miami (Miami, FL)</u></b></p>                                                                                                                                                                                                                                                                                                                                                                                                                                                                                                                                                | <p><b><u>Joslin Diabetes Center (Boston, MA)</u></b></p>                                                                                                                                                                                                                                                                                                                                                                                                                                                                                          |
| <p>Richard P. Donahue, PhD*<br/>Ronald B. Goldberg, MD*<br/>Ronald Prineas, MD, PhD*<br/>Patricia Rowe, MPA**<br/>Jeanette Calles, MSED</p>                                                                                                                                                                                                                                                                                                                                                                                                                                                         | <p>Edward S. Horton, MD*<br/>Kathleen E. Lawton, RN**<br/>Ronald A. Arky, MD<br/>Marybeth Bryant<br/>Jacqueline P. Burke, BSN<br/>Enrique Caballero, MD<br/>Karen M. Callaphan, BA<br/>Om P. Ganda, MD<br/>Therese Franklin<br/>Sharon D. Jackson, MS, RD, CDE<br/>Alan M. Jacobsen, MD</p>                                                                                                                                                                                                                                                       |

Lyn M. Kula, RD  
Margaret Kocal, RN, CDE  
Maureen A. Malloy, BS  
Maryanne Nicosia, MS, RD  
Cathryn F. Oldmixon, RN  
Jocelyn Pan, BS, MPH  
Marizel Quitingon  
Stacy Rubtchinsky, BS  
Ellen W. Seely, MD  
Dana Schweizer, BSN  
Donald Simonson, MD  
Fannie Smith, MD  
Caren G. Solomon, MD, MPH  
James Warram, MD

**VA Puget Sound Health Care System and University of Washington (Seattle, WA)**

Steven E. Kahn, MB, ChB\*  
Brenda K. Montgomery, RN, BSN, CDE\*\*  
Wilfred Fujimoto, MD  
Robert H. Knopp, MD  
Edward W. Lipkin, MD  
Michelle Marr, BA  
Dace Trence, MD

**University of Tennessee (Memphis, TN)**

Abbas E. Kitabchi, PhD, MD, FACP\*  
Mary E. Murphy, RN, MS, CDE, MBA\*\*  
William B. Applegate, MD, MPH  
Michael Bryer-Ash, MD  
Sandra L. Frieson, RN  
Raed Imseis, MD  
Helen Lambeth, RN, BSN  
Lynne C. Lichtermann, RN, BSN  
Hooman Oktaei, MD  
Lily M.K. Rutledge, RN, BSN  
Amy R. Sherman, RD, LD  
Clara M. Smith, RD, MHP, LDN  
Judith E. Soberman, MD  
Beverly Williams-Cleaves, MD

**Northwestern University's Feinberg School of Medicine (Chicago, IL)**

Boyd E. Metzger, MD\*  
Mariana K. Johnson, MS, RN\*\*  
Catherine Behrends  
Michelle Cook, MS  
Marian Fitzgibbon, PhD  
Mimi M. Giles, MS, RD  
Deloris Heard, MA  
Cheryl K.H. Johnson, MS, RN  
Diane Larsen, BS  
Anne Lowe, BS  
Megan Lyman, BS

David McPherson, MD  
Mark E. Molitch, MD  
Thomas Pitts, MD  
Renee Reinhart, RN, MS  
Susan Roston, RN, RD  
Pamela A. Schinleber, RN, MS

**Massachusetts General Hospital (Boston, MA)**

David M. Nathan, MD\*  
Charles McKittrick, BSN\*\*  
Heather Turgeon, BSN\*\*  
Kathy Abbott  
Ellen Anderson, MS, RD  
Laurie Bissett, MS, RD  
Enrico Cagliero, MD  
Jose C. Florez, MD, PhD+  
Linda Delahanty, MS, RD  
Valerie Goldman, MS, RD  
Alexandra Poulos

**University of California-San Diego (San Diego, CA)**

Jerrold M. Olefsky, MD\*  
Mary Lou Carrion-Petersen, RN, BSN\*\*  
Elizabeth Barrett-Connor, MD  
Steven V. Edelman, MD  
Robert R. Henry, MD  
Javiva Horne, RD  
Simona Szerdi Janesch, BA  
Diana Leos, RN, BSN  
Sundar Mudaliar, MD  
William Polonsky, PhD  
Jean Smith, RN  
Karen Vejvoda, RN, BSN, CDE, CCRC

**St. Luke's-Roosevelt Hospital (New York, NY)**

F. Xavier Pi-Sunyer, MD\*  
Jane E. Lee, MS\*\*  
David B. Allison, PhD  
Nancy J. Aronoff, MS, RD  
Jill P. Crandall, MD  
Sandra T. Foo, MD  
Carmen Pal, MD  
Kathy Parkes, RN  
Mary Beth Pena, RN  
Ellen S. Rooney, BA  
Gretchen E.H. Van Wye, MA  
Kristine A. Viscovich, ANP

**Indiana University (Indianapolis, IN)**

David G. Marrero, PhD\*  
Melvin J. Prince, MD\*  
Susie M. Kelly, RN, CDE\*\*  
Yolanda F. Dotson, BS  
Edwin S. Fineberg, MD  
John C. Guare, PhD

|                                                                                                                                                                                                                                                                                                                                                                                                                                                                                                                                                                                                                                                                                                                                                                                                                                                                                                                                                                                                                                                                                                                                                                                                                                                                                                                                                                                                                                              |                                                                                                                                                                                                                                                                                                                                                                                                                                                                                                                                                                                                                                                                                                                                                                                                                                                                                                                                                                                                                                                                                                                                                                                                                                                                                                                                                                                                                                                           |
|----------------------------------------------------------------------------------------------------------------------------------------------------------------------------------------------------------------------------------------------------------------------------------------------------------------------------------------------------------------------------------------------------------------------------------------------------------------------------------------------------------------------------------------------------------------------------------------------------------------------------------------------------------------------------------------------------------------------------------------------------------------------------------------------------------------------------------------------------------------------------------------------------------------------------------------------------------------------------------------------------------------------------------------------------------------------------------------------------------------------------------------------------------------------------------------------------------------------------------------------------------------------------------------------------------------------------------------------------------------------------------------------------------------------------------------------|-----------------------------------------------------------------------------------------------------------------------------------------------------------------------------------------------------------------------------------------------------------------------------------------------------------------------------------------------------------------------------------------------------------------------------------------------------------------------------------------------------------------------------------------------------------------------------------------------------------------------------------------------------------------------------------------------------------------------------------------------------------------------------------------------------------------------------------------------------------------------------------------------------------------------------------------------------------------------------------------------------------------------------------------------------------------------------------------------------------------------------------------------------------------------------------------------------------------------------------------------------------------------------------------------------------------------------------------------------------------------------------------------------------------------------------------------------------|
| <p>Angela M. Hadden<br/>James M. Ignaut, MA<br/>Marcia L. Jackson<br/>Marion S. Kirkman, MD<br/>Kieren J. Mather, MD<br/>Beverly D. Porter, MSN<br/>Paris J. Roach, MD<br/>Nancy D. Rowland, BS, MS<br/>Madelyn L. Wheeler, RD</p> <p><b><u>Medstar Research Institute (Washington, DC)</u></b></p> <p>Robert E. Ratner, MD*<br/>Gretchen Youssef, RD, CDE**<br/>Sue Shapiro, RN, BSN, CCRC**<br/>Catherine Bavidio-Arrage, MS, RD, LD<br/>Geraldine Boggs, MSN, RN<br/>Marjorie Bronsord, MS, RD, CDE<br/>Ernestine Brown<br/>Wayman W. Cheatham, MD<br/>Susan Cola<br/>Cindy Evans<br/>Peggy Gibbs<br/>Tracy Kellum, MS, RD, CDE<br/>Claresa Levatan, MD<br/>Asha K. Nair, BS<br/>Maureen Passaro, MD<br/>Gabriel Uwaifo, MD</p> <p><b><u>University of Southern California/UCLA Research Center (Alhambra, CA)</u></b></p> <p>Mohammed F. Saad, MD*<br/>Maria Budget**<br/>Sujata Jinagouda, MD**<br/>Khan Akbar, MD<br/>Claudia Conzues<br/>Perpetua Magpuri<br/>Kathy Ngo<br/>Amer Rassam, MD<br/>Debra Waters<br/>Kathy Xapthalamous</p> <p><b><u>Washington University (St. Louis, MO)</u></b></p> <p>Julio V. Santiago, MD* (deceased)<br/>Samuel Dagogo-Jack, MD, MSc, FRCP, FACP*<br/>Neil H. White, MD, CDE*<br/>Samia Das, MS, MBA, RD, LD**<br/>Ana Santiago, RD**<br/>Angela Brown, MD<br/>Edwin Fisher, PhD<br/>Emma Hurt, RN<br/>Tracy Jones, RN<br/>Michelle Kerr, RD<br/>Lucy Ryder, RN<br/>Cormarie Wernimont, MS, RD</p> | <p><b><u>Johns Hopkins School of Medicine (Baltimore, MD)</u></b></p> <p>Christopher D. Saudek, MD*<br/>Vanessa Bradley, BA**<br/>Emily Sullivan, MEd, RN**<br/>Tracy Whittington, BS**<br/>Caroline Abbas<br/>Frederick L. Brancati, MD, MHS<br/>Jeanne M. Clark, MD<br/>Jeanne B. Charleston, RN, MSN<br/>Janice Freel<br/>Katherine Horak, RD<br/>Dawn Jiggetts<br/>Deloris Johnson<br/>Hope Joseph<br/>Kimberly Loman<br/>Henry Mosley<br/>Richard R. Rubin, PhD<br/>Alafia Samuels, MD<br/>Kerry J. Stewart, EdD<br/>Paula Williamson</p> <p><b><u>University of New Mexico (Albuquerque, NM)</u></b></p> <p>David S. Schade, MD*<br/>Karwyn S. Adams, RN, MSN**<br/>Carolyn Johannes, RN, CDE**<br/>Leslie F. Adler, PhD<br/>Patrick J. Boyle, MD<br/>Mark R. Burge, MD<br/>Janene L. Canady, RN, CDE<br/>Lisa Chai, RN<br/>Ysela Gonzales, RN, MSN<br/>Doris A. Hernandez-McGinnis<br/>Patricia Katz, LPN<br/>Carolyn King<br/>Amer Rassam, MD<br/>Sofya Rubinchik, MD<br/>Willette Senter, RD<br/>Debra Waters, PhD</p> <p><b><u>Albert Einstein College of Medicine (Bronx, NY)</u></b></p> <p>Harry Shamoan, MD*<br/>Janet O. Brown, RN, MPH, MSN**<br/>Elsie Adorno, BS<br/>Liane Cox, MS, RD<br/>Jill Crandall, MD<br/>Helena Duffy, MS, C-ANP<br/>Samuel Engel, MD<br/>Allison Friedler, BS<br/>Crystal J. Howard-Century, MA<br/>Stacey Kloiber, RN<br/>Nadege Longchamp, LPN<br/>Helen Martinez, RN, MSN, FNP-C<br/>Dorothy Pompei, BA</p> |
|----------------------------------------------------------------------------------------------------------------------------------------------------------------------------------------------------------------------------------------------------------------------------------------------------------------------------------------------------------------------------------------------------------------------------------------------------------------------------------------------------------------------------------------------------------------------------------------------------------------------------------------------------------------------------------------------------------------------------------------------------------------------------------------------------------------------------------------------------------------------------------------------------------------------------------------------------------------------------------------------------------------------------------------------------------------------------------------------------------------------------------------------------------------------------------------------------------------------------------------------------------------------------------------------------------------------------------------------------------------------------------------------------------------------------------------------|-----------------------------------------------------------------------------------------------------------------------------------------------------------------------------------------------------------------------------------------------------------------------------------------------------------------------------------------------------------------------------------------------------------------------------------------------------------------------------------------------------------------------------------------------------------------------------------------------------------------------------------------------------------------------------------------------------------------------------------------------------------------------------------------------------------------------------------------------------------------------------------------------------------------------------------------------------------------------------------------------------------------------------------------------------------------------------------------------------------------------------------------------------------------------------------------------------------------------------------------------------------------------------------------------------------------------------------------------------------------------------------------------------------------------------------------------------------|



Jonathan Scheindlin, MD  
Elissa Violino, RD, MS  
Elizabeth Walker, RN, DNSc, CDE  
Judith Wylie-Rosett, EdD, RD  
Elise Zimmerman, RD, MS  
Joel Zonszein, MD

**University of Pittsburgh (Pittsburgh, PA)**

Trevor Orchard, MD\*  
Rena R. Wing, PhD\*  
Gaye Koenning, MS, RD\*\*  
M. Kaye Kramer, BSN, MPH\*\*  
Susan Barr, BS  
Miriam Boraz  
Lisa Clifford, BS  
Rebecca Culyba, BS  
Marlene Frazier  
Ryan Gilligan, BS  
Susan Harrier, MLT  
Louann Harris, RN  
Susan Jeffries, RN, MSN  
Andrea Kriska, PhD  
Qurashia Manjoo, MD  
Monica Mullen, MHP, RD  
Alicia Noel, BS  
Amy Otto, PhD  
Linda Semler, MS, RD  
Cheryl F. Smith, PhD  
Marie Smith, RN, BSN  
Elizabeth Venditti, PhD  
Valarie Weinzierl, BS  
Katherine V. Williams, MD, MPH  
Tara Wilson, BA

**University of Hawaii (Honolulu, HI)**

Richard F. Arakaki, MD\*  
Renee W. Latimer, BSN, MPH\*\*  
Narleen K. Baker-Ladao, BS  
Ralph Beddow, MD  
Lorna Dias, AA  
Jillian Inouye, RN, PhD  
Marjorie K. Mau, MD  
Kathy Mikami, BS, RD  
Pharis Mohideen, MD  
Sharon K. Odom, RD, MPH  
Raynette U. Perry, AA

**Southwest American Indian Centers (Phoenix, AZ;  
Shiprock, NM; Zuni, NM)**

William C. Knowler, MD, DrPH\*+  
Norman Coeoyate\*\*  
Mary A. Hoskin, RD, MS\*\*  
Carol A. Percy, RN, MS\*\*  
Kelly J. Acton, MD, MPH

Vickie L. Andre, RN, FNP  
Rosalyn Barber  
Shandiin Begay, MPH  
Peter H. Bennett, MB, FRCP  
Mary Beth Benson, RN, BSN  
Evelyn C. Bird, RD, MPH  
Brenda A. Broussard, RD, MPH, MBA, CDE  
Marcella Chavez, RN, AS  
Tara Dacawyma  
Matthew S. Doughty, MD  
Roberta Duncan, RD  
Cyndy Edgerton, RD  
Jacqueline M. Ghahate  
Justin Glass, MD  
Martia Glass, MD  
Dorothy Gohdes, MD  
Wendy Grant, MD  
Robert L. Hanson, MD, MPH  
Ellie Horse  
Louise E. Ingraham, MS, RD, LN  
Merry Jackson  
Priscilla Jay  
Roylen S. Kaskalla  
David Kessler, MD  
Kathleen M. Kobus, RNC-ANP  
Jonathan Krakoff, MD  
Catherine Manus, LPN  
Sara Michaels, MD  
Tina Morgan  
Yolanda Nashboo (deceased)  
Julie A. Nelson, RD  
Steven Poirier, MD  
Evette Polczynski, MD  
Mike Reidy, MD  
Jeanine Roumain, MD, MPH  
Debra Rowse, MD  
Sandra Sangster  
Janet Sewenemewa  
Darryl Tonemah, PhD  
Charlton Wilson, MD  
Michelle Yazzie

**George Washington University Biostatistics Center  
(DPP Coordinating Center Rockville, MD)**

Raymond Bain, PhD\*  
Sarah Fowler, PhD\*  
Tina Brennehan\*\*  
Solome Abebe  
Julie Bamdad, MS  
Jackie Callaghan  
Sharon L. Edelstein, ScM  
Yuping Gao

|                                                                                                                                                                                                                                                                                                                                                                                                                                                                                                                                                                                                                                                                                                                                                                                                                                                                                                                                                                                                                                                                                                                                                                                                                                                                                                                                                                                                                                                                                                         |                                                                                                                                                                                                                                                                                                                                                                                                                                                                                                                                                                                                                                                                                                                                                                                                                                                                                                                                                                                  |
|---------------------------------------------------------------------------------------------------------------------------------------------------------------------------------------------------------------------------------------------------------------------------------------------------------------------------------------------------------------------------------------------------------------------------------------------------------------------------------------------------------------------------------------------------------------------------------------------------------------------------------------------------------------------------------------------------------------------------------------------------------------------------------------------------------------------------------------------------------------------------------------------------------------------------------------------------------------------------------------------------------------------------------------------------------------------------------------------------------------------------------------------------------------------------------------------------------------------------------------------------------------------------------------------------------------------------------------------------------------------------------------------------------------------------------------------------------------------------------------------------------|----------------------------------------------------------------------------------------------------------------------------------------------------------------------------------------------------------------------------------------------------------------------------------------------------------------------------------------------------------------------------------------------------------------------------------------------------------------------------------------------------------------------------------------------------------------------------------------------------------------------------------------------------------------------------------------------------------------------------------------------------------------------------------------------------------------------------------------------------------------------------------------------------------------------------------------------------------------------------------|
| <p>Kristina L. Grimes<br/>Nisha Grover<br/>Lori Haffner, MS<br/>Steve Jones<br/>Tara L. Jones<br/>Richard Katz, MD<br/>John M. Lachin, ScD<br/>Pamela Mucik<br/>Robert Orlosky<br/>James Rochon, PhD<br/>Alla Sapozhnikova<br/>Hanna Sherif, MS<br/>Charlotte Stimpson<br/>Marinella Temprosa, MS<br/>Fredricka Walker-Murray</p> <p><b><u>Central Biochemistry Laboratory (Seattle, WA)</u></b><br/>Santica Marcovina, PhD, ScD*<br/>Greg Strylewicz, PhD**<br/>F. Alan Aldrich</p> <p><b><u>Carotid Ultrasound</u></b><br/>Dan O’Leary, MD*</p> <p><b><u>CT Scan Reading Center</u></b><br/>Elizabeth Stamm, MD*</p> <p><b><u>Epidemiological Cardiology Research Center-<br/>Epicare (Winston-Salem, NC)</u></b><br/>Pentti Rautaharju, MD, PhD*<br/>Ronald J. Prineas, MD, PhD*/*<br/>Teresa Alexander<br/>Charles Campbell, MS<br/>Sharon Hall<br/>Yabing Li, MD<br/>Margaret Mills<br/>Nancy Pemberton, MS<br/>Farida Rautaharju, PhD<br/>Zhuming Zhang, MD</p> <p><b><u>Nutrition Coding Center (Columbia, SC)</u></b><br/>Elizabeth Mayer-Davis, PhD*<br/>Robert R. Moran, PhD**</p> <p><b><u>Quality of Well-Being Center (La Jolla, CA)</u></b><br/>Ted Ganiats, MD*<br/>Kristin David, MHP*<br/>Andrew J. Sarkin, PhD*<br/>Erik Groessl, PhD</p> <p><b><u>NIH/NIDDK (Bethesda, MD)</u></b><br/>R. Eastman, MD<br/>Judith Fradkin, MD<br/>Sanford Garfield, PhD</p> <p><b><u>Centers for Disease Control &amp; Prevention (Atlanta, GA)</u></b><br/>Edward Gregg, PhD<br/>Ping Zhang, PhD</p> | <p><b><u>University of Michigan (Ann Arbor, MI)</u></b><br/>William H. Herman, MD, MPH<br/><b><u>+Genetics Working Group</u></b><br/>Jose C. Florez, MD, PhD<sup>1,2</sup><br/>David Altshuler, MD, PhD<sup>1,2</sup><br/>Liana K. Billings, MD<sup>1</sup><br/>Ling Chen, MS<sup>1</sup><br/>Maegan Harden, BS<sup>2</sup><br/>Robert L. Hanson, MD, MPH<sup>3</sup><br/>William C. Knowler, MD, DrPH<sup>3</sup><br/>Toni I. Pollin, PhD<sup>4</sup><br/>Alan R. Shuldiner, MD<sup>4</sup><br/>Kathleen Jablonski, PhD<sup>5</sup><br/>Paul W. Franks, PhD, MPhil, MS<sup>6,7,8</sup><br/>Marie-France Hivert, MD<sup>9</sup></p> <p>1=Massachusetts General Hospital<br/>2=Broad Institute<br/>3=NIDDK<br/>4=University of Maryland<br/>5=Coordinating Center<br/>6=Lund University, Sweden<br/>7=Umeå University, Sweden<br/>8=Harvard School of Public Health<br/>9=Université de Sherbrooke</p> <p>* denotes Principal Investigator<br/>** denotes Program Coordinator</p> |
|---------------------------------------------------------------------------------------------------------------------------------------------------------------------------------------------------------------------------------------------------------------------------------------------------------------------------------------------------------------------------------------------------------------------------------------------------------------------------------------------------------------------------------------------------------------------------------------------------------------------------------------------------------------------------------------------------------------------------------------------------------------------------------------------------------------------------------------------------------------------------------------------------------------------------------------------------------------------------------------------------------------------------------------------------------------------------------------------------------------------------------------------------------------------------------------------------------------------------------------------------------------------------------------------------------------------------------------------------------------------------------------------------------------------------------------------------------------------------------------------------------|----------------------------------------------------------------------------------------------------------------------------------------------------------------------------------------------------------------------------------------------------------------------------------------------------------------------------------------------------------------------------------------------------------------------------------------------------------------------------------------------------------------------------------------------------------------------------------------------------------------------------------------------------------------------------------------------------------------------------------------------------------------------------------------------------------------------------------------------------------------------------------------------------------------------------------------------------------------------------------|

## ACCORD Investigators (as of May 11, 2010)

**Steering Committee:** W.T. Friedewald (*Chair*), J.B. Buse (*Vice Chair*), J.T. Bigger, R.P. Byington, W.C. Cushman, F. Ismail-Beigi, H. C. Gerstein, H. N. Ginsberg, D.C. Goff, Jr, R.H. Grimm, Jr, J.L. Probstfield, D.G. Simons-Morton.

### ***Clinical center networks (CCNs) and clinical sites:***

**Canadian CCN:** *Population Health Research Institute, Hamilton General Hospital, Canadian Diabetes Outcome Researchers (CANDOR Network), Hamilton, Ontario, Canada:* H.C. Gerstein, S. Yusuf, Z. Punthakee, R. Russo, S. Anand, K Chrysler\*, B. Cracknell, T. Cukierman-Yaffe, A. Gafni, G. Guyatt\*, S. Hall, J. Kaszyca, E. Lonn\*, P. Mackie\*, V. Reiding, N. Shehadeh\*, B. Tadeson\*, K. Thompson\*, M. Vallis, V. Vasudeva, I. Wilderman\*, D. Wright

### ***Canadian clinical sites:***

*McMaster Medical Centre, Hamilton, Ontario, Canada:* Z. Punthakee, A. Smith, I. Stanton, S. Capes\*, P. Manjoo\*, T. Valla, S. Danby\*, W. Harper\*, P. Harvey, D. Hunt, Audrey Moroso\*, Rose Otto, Ally Prebtani.

*Six Nations Health Services, Ohsweken, Ontario, Canada:* Z. Punthakee, A. Davis, S. Capes\*, K.L. Hill, V. McCarthy.

*Diabetes, Hypertension and Cholesterol Centre, University of Calgary, Calgary, Alberta, Canada:* A.L. Edwards, D.J. Mitchell, M.A. Clearwaters, C. Dielissen\*, M. Gillam, B. Hammond\*, H. Jensen\*, A. Kherani\*, D. Lau, V. Pringle, D. Rabi, R. Sigal, C. Smith\*, M. Walker\*, G. Williams\*.

*Memorial University of Newfoundland, St. John's, Newfoundland, Canada:* C. Joyce, M. Parsons, B. Rowe, J. Burton\*, V. Chandurkar, S. CoadyMcDonald\*, D. Gibbons\*, C. Kovacs, B. Murphy\*, R. Smart\*, S. Varghese.

*University of Alberta, Edmonton, Alberta, Canada:* L. Mereu, E. Ryan, P. Senior, P. Kirkland, J. Abe\*, K. Dalton, W. Gendall, J. Germsheid\*, D. Hartmann\*, A. Jeffrys\*, U. Kumar\*, C. MacDonald, N. Makhani, S. Mawani\*, F. Morales, B. Paty\*, M. Pick\*, B. Schwanke, A. Stark, M. Tennant, S. Varma\*, D. Weiss-Aburto, P. WerbiskiWood, B. Woloschuk, W. Zimmerman\*.

*Centre de Recherche Clinique de Laval, Laval, Quebec, Canada:* A. Bélanger, S. Gauthier, G. Bahsali\*, C. Barbeau\*, E. Caponi\*, R. Duchesne\*, R. Dumas, P. Gauthier, J. Girouard\*, N. Kandalaft\*, M. Labbé, J. Palardy, M. Pilon, J. Raymond, A. Schiffrin.

*St. Joseph's Health Care London, London, Ontario, Canada:* I. Hramiak, S. Tereschyn, M. Driscoll, M. Gehring, J. Gonder, C. Lincoln, W. McBeth, C. McDonald, T. McDonald\*, P. Pauli\*, T. Paul, S. Powers\*, N. Ronald, V. Trinh\*, L. Vancer\*, G. Walsh\*.

*Ottawa Hospital, Division of Endocrinology and Metabolism, Ottawa, Ontario, Canada:* H. Lochnan, T.C. Ooi, J. Maranger, L. Bradley\*, R. Buhrmann, M. Cyr\*, C. Gilchrist\*, B. Hanlon\*, M. Harley\*, K. Jay\*, T. Leech, J. Malcolm, M. McLean\*, E. Parker\*, R. Sigal\*, K. Sullivan.

*Royal Victoria Hospital, Montreal, Quebec, Canada:* J.F. Yale, S.A. Segal, G. Al Ansari, N. Renouf\*, N. Allaire\*, M.A.M.A. Alawadhi\*, B. Belfer\*, D.W. Blank, F. Bouchard\*, S. BuoyPhang\*, J. Carter, L. Coppin\*, D. Dalpe\*, I. Delpech\*, P.M. Doran†, F. Emmian\*, S. Fortin\*, N. Garfield, M. Gosselin\*, S. Horan\*, M. Kalergis\*, S. Koutelias\*, C. Légaré\*, A. Lombardo\*, J.A. Morais, M. Quigley\*, N. Renouf\*, C. Riopel\*, S. Riopel, J.A. Rivera, G. Rochon\*, M. Roy, M. Salera\*, M.H. Sherman, M. Shingler\*, H.E. Staples\*, L. Ulyatt\*, Z. Yared\*.

*St. Michael's Hospital, Toronto, Ontario, Canada:* L.A. Leiter, G. Booth, L. Sparrow\*, H. Choi, D.C. Bedard, A. Berger\*, L.A. Berndl, A. Cheng\*, V. Evalmplev\*, J. Goguen, A. Hanna, R.G. Josse, J.A. Kalas\*, S. Perry, M. Pike\*.

*Vancouver General Hospital, Vancouver, British Columbia, Canada:* T. Elliott, K. Dawson, J. Kong, D. Albiani\*, M. Inducil, R. Al Amoudi\*, T. Broughton\*, L. Hall\*, B. Harrison\*, N. Hirvi\*, R. Lee\*, A. Merkur\*, E. Norman\*, B. Paty, M. Potter, D. Stevenson\*, A. Vafadaran.

*Health Sciences Centre Diabetes Research Group, Winnipeg, Manitoba, Canada:* V. Woo, L. Berard, T. Anderlic, K. Austman\*, A. Bernard\*, D. Catte\*, P. Darvill\*, D. Hak, K. Hutchison\*, L. Janzen\*, T. Klopak, C. Mandock, M. Mathen\*, S. Mawani\*, A. Mawani\*, L. Murphy†, G. Nyomba, B. Penner\*, S. Pockett\*, S. Russell\*, F. Stockl, J. Studney\*, R. Sukkau.

*Queen Elizabeth II Health Sciences Centre, Halifax, Nova Scotia, Canada:* C. Abbott, E. Ur\*, M. Yuille, M. Archibald\*, D. Clayton, A. Cruess, N. Davis, H. Fong\*, S. Frizzell\*, B. Hanway\*, A. Hoskin-Mott, A. Imran, C. Ingraham\*, G. McCarthy, H. Murdock\*, T. Palmer, A.M. Patterson\*, T. Ransom, D. Shu\*, J. Tuttle\*.

**Western CCN:** University of Washington, Seattle, WA: J.L. Probstfield, C. Kingry, A.S. Line, M.A. Corson, R. Knopp\*, E. Lipkin\*, M.D. Sullivan, J. Johnson, C. Griswold\*, K. Liebert\*, A. Brown\*, D. Juliano\*, E.M. Kurashige\*, S. Moberg\*, J. Leader

**Western clinical sites:**

*Northridge Hospital Medical Center, Cardiovascular Center, Northridge, CA:* K. Ariani, K. Karunaratne, M. Azizad\*, C. Chow\*, H. Gutierrez, J. Partamian\*, J. Toven\*, J. Toven, J. Mular\*, S. Sanders\*

*White Memorial Medical Center, Clinical Hypertension Services, Los Angeles, CA:* L.J. Haywood, V. Kamdar\*, D.L. DeQuattro, L. Wang, Z. Song, L. Becerra, A. Qi Cai\*, C. Pruitt\*, V. DeQuattro†

*University of Washington Medical Center at Roosevelt, Family Medical Center, Seattle, WA:* R. Failor, A. Ellsworth\*, N. Jackson, C. Miller, D. Britt\*, S. Dobie\*, I. Hirsch\*, D. Khakpour\*, R. Quaempts\*, W. Stoffel\*, W. Neighbor\*, K. Cappocia\*, V. Hawkins\*, L. Tapp

*Idaho State University, Department of Family Medicine, Pocatello, ID:* R. Force, M. Macdonald, K. Pettingill, C. Liday\*, S. Koester\*, T. Pettinger, R. Solbrig, C. Waldron\*, W. Woodhouse\*, B. Hoover\* S. Lusk, T. Wilcox\*, D. Hachey\*

*Naval Medical Center San Diego, Cardiology Division, San Diego, CA:* P.E. Linz, P.V. Pepper, J. Kozlowski, C. Chase\*, C. Griffin, D. Samuelson\*, P. Gutierrez\*, C. Gonzales, M. Engle\*, J. Coopersmith\*, S. Griffin, R. Lammers\*, J. Leon\*, D. Zirkle\*, S. Hollingsworth\*

*Oregon Health & Science University, Section of Diabetes, Portland, OR:* M.C. Riddle, K.A. Hanavan, P.A. McDaniel, R. Swift, A.J. Ahmann\*, S.C. Gammell-Matthews, D.M. Karl, V. Burden\*, B. MacNeil, M. MacMurray, J. Weiss\*, C. Carlson\*, S.K. DesRochers\*, D. Negreanu\*, E.A. Stephens\*, D. Gale\*

*Washington State University, Spokane, WA:* C. Wysham, D. Weeks, L. Kuntsmann, L. Maxwell\*, S. Yedinak, H. Pena\*, J. Kistler\*, J. White\*

*Kaiser Endocrine Clinic, San Diego, CA:* J. Dudl, L. Lyons, B. House, M. Murray, R. Stevenson\*, P. Wu\*, A. Palma\*, S. Briere\*, T. Wilson\*, D. Becker\*, K. Harden\*, C. Hawley\*

*Whittier Institute for Diabetes, Clinical Trials Department, La Jolla, CA:* G. Dailey, M. Baron, A. Gianella, M. Jacobson\*, E. Farro\*, A. Philis-Tsimikas\*, A. Banares\*, A. Bravo-Medina\*, J. Horne\*, E. Esquer\*, R. Morrissey\*

***Minnesota-Iowa CCN:*** Berman Center for Outcomes & Clinical Research, Minneapolis, MN: R.H. Grimm, Jr, B.R. Kirpach, M.M. Bartkoske, C.M. Boyce\*, N. Druckman\*, A.M. Gillett\*, J.A. Levin, G.J. Livingston, A.M. Murray, H. Wood\*, HealthPartners Research Foundation, Minneapolis, MN: K.L. Margolis.

***Minnesota-Iowa clinical sites:***

*Hennepin ACCORD Clinic, Minneapolis, MN:* S. Kempainen, M. Madden, M. Tariq Fareed\*, K. Hall\*, R. Moor\*, K. Wood.

*International Diabetes Center, Minneapolis, MN:* R. Bergenstal, R. Cuddihy, B. Davick\*, J. Hokanson\*, M. Johnson, M. Lausch\*, S. List, A. Monk, R. Robinson\*, K. Smith\*, D. Whipple, G. Damberg, R. Hahn\*, V. Koenig\*, M. Magadan, S. Sabin-Smith\*, P. Stewart\*, E. Strock, D. Peremislov, K. Gunyou, R. Passi . C. Ashanti, L. Thomas, D. Stoffels.

*University of Minnesota, Minneapolis, MN:* E.R. Seaquist, M.V. Mech, L.E. Benedict\*, D.J. Demmon\*, D. Kendall\*, A.F. Kumar\*, S.M. Martinson\*, S.A. Miller\*, C. Pease\*, J.P. Rao\*, J.B. Redmon\*, J.E. Swanson†, J.K. Wimmer\*, Y. Okorochoa, M. Stiles\*, C. Kodl\*, C. Chadha\*

*University of Minnesota, Phalen Village Clinic, St. Paul, MN:* KA.. Peterson, L.A. Seaquist, C. Boese\*, M. Cruciani\*, E. Dodds, F. Parenteau Ek\*, J.L. Feldman\*, P. Fontaine\*, C.J. Lange, T.J. Mendenhall\*, A.M. Peterson\*, A. Rudelt\* T.M. Schrock\*, D.P. Spielman\*, S. Velasco\*, J.C. Weinhand\*.

*Riverside Health Partners Clinic, Department of Endocrinology, Minneapolis, MN:* J.M. Sperl-Hillen, P.J. O'Connor, M.E. Busch, A. Chung\*, B.K. Klein\*, N. Krugen\*, T. Bunkers-Lawson\*, H.L. Ekstrom\*, H.S. Gunderson\*, B.M. Johnson\*, J.H. MacIndoe\*, D.J. Prewedo\*, J.L. Rawl\*, C.M. Roethke\*, Mary Quinlan, C.R. Fox, B.M. Bate, Q.T. Cao\*. M.M. Ohnstad, P.J. Meyers\*.

*University of Iowa, Health Care Diabetes Clinical Research and Programs, Iowa City, IA:* W.I. Sivitz, S.M. Wayson, T.A. Lower\*, L. Larson, L.A. Ahrens\*, M. Bayless, S.E. Beck\*, J. Chahal, C. Chenard, G.C. Doelle, V.M. Guzman, U.M. Kabadi\*, K.A. Ochs\*, A. Rahhal, R.G. Spanheimer\*, L. Snetselaar\*, K. Smith\*, D. Wells\*.

**Ohio-Michigan CCN: Case Western Reserve University, Division of Clinical and Molecular Endocrinology, Cleveland, OH:** S. Genuth, F. Ismail-Beigi, M. Thibonnier\*, L. Vargo\*, C. Kelly\*, T. Bongorno\*, A. Dolish\*, L. Pavlik, M. Tiktin, S. Isteitieh\* A. Bartlett, T. Kulow.

**Ohio-Michigan clinical sites:**

*University Hospitals of Cleveland, Division of Endocrinology, and University Hospitals Westlake Medical, Cleveland, OH:* F. Ismail-Beigi, A. Krikorian, L. Moore, L. Richardson, E. Coles-Herman\*, K. Yee\*, J. Frankino, M. Jing\*, A. Sood, L. Hustak\*, M. Julius\*, L. Pavlik\*, T. Ross\*, L. Long\*, W. Schwing\*, M. Tiktin\*, M.K. Sullivan\*, L. Strauss\*, K. Behm\*, F. Eskandari\*, C. Hall\*, D. Hayes\*, K. Horowitz, S. Isteitieh\*, Z. Madhun\*, E. Seeholzer\*, J. Shina\*, H. Taylor\*, A. Schnall\*, S. Huang, M. Heeg, J. Tang, J. Belkin\*, M.S. Lee\*, T. Joly\*.

*St. Vincent Charity Hospital, Lipid Research Center, Cleveland, OH:* L.S. Sadler, M. Griffith\*, A. Hornsby\*, K. Klyn, E. Ospelt, L. Long, M. DeSmit\*, P. McCann, N.P. Schmidt\*, C. Gottfried, T. Kulow, J. Zaletal\*, M.S. Kapadia, L. Smith\*.

*University Suburban Health Center, South Euclid, OH:* A.M. Schnall, L. Dragmen, R. Ellert\*, J. Smith, J. Leksan, T. Sussman, S. Huang, M. Heeg, J. Tang, J. Belkin\*, M.S. Lee\*, T. Joly\*.

*Cleveland Veterans Affairs (VA) Medical Center (VAMC), Department of Medicine, and Ravenna Community Based Outpatient Clinic, Cleveland, OH:* F. Ismail-Beigi, L. Hustak\*, M. Julius\*, W. Schwing, M. Tiktin\*, J. Anselmo\*, F. Eskandari\*, S. Daymeyer\*, C. Hall\*, D. Hayes\*, K. Horowitz\*, S. Isteitieh\*, C. Johnson\*, E. Kern, M.A. Richmond\*, L. Richardson, K. Roberts\*, J. Shina\*, A. Sood, P. Suhan\*, H. Taylor\*, S. Watts\*, J. Martin, L. Moor\*, B. Burtch\*, S. Ober, G.J. Strauss, A. Leone, J. Belkin\*, S. Huang\*, K. Frank\*, D. Stephens\*, M.S. Lee\*, T. Joly\*.

*The Cleveland Clinic Foundation, Cleveland, OH:* B.J. Hoogwerf\*, J. Brakeman, M. Matzinger\*, J. Newsome\*, J. Becker\*, S. Bizjack\*, B. Clingman\*, S. Curtas-Thomas, G. Depietro\*, R. Ellert\*, C. Horner, G. Bunae\*, A. Hamrahian\*, A. Hawkins\*, T. Head\*, S. Iannica\*, L. Jones\*, P. Kaiser, R. McCoy, A. Mehta, L. Olansky, A. Orasko, S. Reddy\*, D. Ross\*, L. Shockley\*, E. Siraj\*, M. Williams\*, R. Zimmerman M.Hamaty.

*Your Diabetes Endocrine Nutrition Group, Mentor, OH:* D. Weiss, K.A. Fagan, T.M. Hanslik\*, J. Farrell\*, P. Brys\*, M. Oligny, K. Prokop, K. Lenardic\*, T. Karapanzicik\*, S. Huang, M. Heeg, J. Tang, J. Belkin\*, M.S. Lee\*, T. Joly\*.

*Medical University of Ohio, Department of Medicine, Ruppert Health Center, Toledo, OH:* B. Akpunonu, R. Franco-Saenz†, J. Gilmore, M. Gilmore, L. Godfrey\*, P. Ross\*, B. Bauer, M. Christtie\*, A. Lopez, P. Mulrow, C. Peters\*, R. Pop-Busui\*, J. Roman\*, C. Smith\*, J. Bick\*, Z. Blust\*, P.T. Nelsen, D. Marcus\*.

*The Ohio State University Medical Center, Division of Endocrinology, Diabetes and Metabolism, Columbus, OH:* K. Osei, E.A. Dziengelewski\*, H. Breedlove, D. Boland\*, C. Casey Boyer, S. Cataland, P. A. Kearns, J.E. Irwin, D.P. Schuster, J.L. Varga-Spangler\*, T. Bowles, K. Weiland, K. Arnold; T. Evans\*, J. Bouttamy, A. Letson, E. Craig, F. Davidorf.

*University of Cincinnati/VA Medical Center, Research Service, Cincinnati, OH:* R.M. Cohen, K. Burton, J. Craig, B. Carter\*, J. Harrer\*, R. Hurd\*, D. Lopez-Stickney\*, C. Pritchard\*, A. Pfefferman\*, B.A. Ramlo-Halsted\*, C. McCormick, C. Riley, M. Strominger\*, A. Knittel, G. Groff\*, C. Bailey, A. Howald, N. Anderson, J. Laver Bierschbach, M. Tyzinski\*, B. Smith\*, S. Krug, V. Hershberger\*, R.K. Hutchins\*, L.A. Raymond\*.

*Henry Ford Health System–New Center One, Detroit, MI:* A.Thomas, D.M. Kahkonen\*, T. Cushman, M. Roman, A.M. Stys, K. White, M. Austin\*, C. Chatterton, J.K. Francis\*, C. Jones\*, D. Kruger, A. McLellan\*, F. Whitehouse, E. Higgins\*, S. Levy, A. Schoenherr\*, P. Edwards.

*Grunberger Diabetes Institute, Bloomfield Hills, MI:* G. Grunberger, L.C. Aman\*, A.H. Bandagi\*, K.M. Russell\*, C. Tucker, Y. Abidova\*, A. Amirikia, M. Narduccio, B. Billingsly.

*Northeastern CCN: Columbia University College of Physicians and Surgeons, New York, NY:* J.T. Bigger, C.R. Lopez-Jimenez, R. Bornholdt, L. Busaca, H.N. Ginsberg, P. Gonzales, D. Gosh\*, P. Love†, A. Kosok\*, E. Robinson\*, R. Steinman, C. Watson, G. Reyes.

***Northeastern clinical sites:***

*Jacobi Medical Center, Bronx, NY:* U.K. Schubart, M. Mendoza, G. Goswami, A. Laufer\*, J. Russo, N. Vincenty.

*Albert Einstein General Clinical Research Center, Bronx, NY:* M.H. Alderman, L. Carroll, M.J. Sanguily\*, J.U. Gorkin, A.C. Mayer, L. Ramos, V. Sessoms, A. Fritts Stewart\*.

*Cornell Internal Medicine Associates, New York, NY:* D. Brillon, J. Cordero, M.A. Richardson, E. Wei, F. Ganz, B.R. Meyer, J. Paley\*, S. Anderson\*, C. Charles\*, A. Dwoskin\*, R. Chiong\*, K. Hyams.

*The Diabetes Care and Information Center of New York, Flushing, NY:* D.L. Lorber, T. Arenstein\*, P. Depree, A.A. Elmorsy\*, J.M. Wendel, L.L. Zintl\*, P. August, M. Beck\*, M.D. Goldberg, M.J. Hofacker\*, M. Marotta-Kollarus\*, E.J.L. Ocampo, C.A. Resta, J.M. Tibaldi.

*The Cooper Health System, Cherry Hill, NJ:* A. Bastien\*, S. Grudzinski\*, P. Niblack, L. Abreu\*, T. Brobyn, K. Brown\*, M. Casale\*, D. Dougherty\*, G. Haddad, K. Heintz, M. Kelly,\* D. Linneman\*, C. Olivia, M.A. Salvador\*, P. Zee\*, D. Hyman.

*The Cooper Health System, Cherry Hill, NJ:* A. Bastien\*, S. Grudzinski\*, P. Niblack, L. Abreu\*, T. Brobyn, K. Brown\*, M. Casale\*, D. Dougherty\*, G. Haddad, K. Heintz, M. Kelly,\* D. Linneman\*, C. Olivia, M.A. Salvador\*, P. Zee\*, D. Hyman.

*Great Lakes Medical Clinic Research, Westfield, NY:* D.F. Brautigam, R. Fischer, J.M. Chiarot, D.M. Scharf\*, B. Nunn\*, J. Carlson, C. Flanders\*, M.R. Hagen, S. Newman, T.A. Gordon.

*Naomi Berrie Diabetes Center, New York, NY:* R. Goland, C.H. Tuck†, P. Kringas, J. Hey-Hadavi\*, J. Montes\*, J. Vargas-Jerez, J. Salas-Spiegel.

*Ambulatory Care Network at Columbia University, New York, NY:* A. Getaneh, J. Ramirez\*, E.F. Vasquez\*, G. Kranwinkel\*, S.A. Durant.

*Irving Diabetes Research Unit, New York, NY:* D.S. Donovan, G. Febres\*, C. Hernandez\*, M.A. Jonaitis, L. Mesa\*.

*State University of New York Downstate Medical Center, Brooklyn, NY:* M.A. Banerji, M. Norton, P. Patel\*, V. Daly, S. Hirsch, C. Jazmin, R. Khillan, D. Mendonca, A. Relingado, E. Sandoval, M. Tiewala.

*Kings County, Brooklyn, NY:* M.A. Banerji, M. Norton, P. Patel\*, V. Daly, S. Hirsch, C. Jazmin, R. Khillan, D. Mendonca, A. Relingado, E. Sandoval, M. Tiewala.

*The Cooper Health System, Cherry Hill, NJ:* A. Bastien\*, S. Grudzinski\*, P. Niblack, L. Abreu\*, T. Brobyn, K. Brown\*, M. Casale\*, D. Dougherty\*, G. Haddad, K. Heintz, M. Kelly,\* D. Linneman\*, C. Olivia, M.A. Salvador\*, P. Zee\*, D. Hyman.

**Southeastern CCN: Wake Forest University School of Medicine, Department of Public Health Sciences, Winston-Salem, NC:** D.C. Goff, Jr, J.H. Summerson, L. Crago, C.S. Blackwell\*, A. Bertoni\*, R.L. Blaine\*, J.K. Kirk, R.L. Spach, J. Williamson, J. Calles, J. Katula, D.B. Wishnietsky\*.

**Southeastern clinical sites:**

*Duke University Medical Center, Durham, NC:* M.N. Feinglos, J. Jones, M.B. Mason, M.A. Furst, W.J. Bean\*, G. Gedon-Lipscomb, J.B. Green, T. Parham\*, B.M. Satterwhite\*, C.R. Thacker.

*Constant Care, Inc., Valdosta, GA:* D. Padhiar, R. Noel\*, N. Padhiar, S. West\*, J. Braden, A Francis\*.

*Wake Forest University School of Medicine, Department of Geriatrics/Gerontology, Winston-Salem, NC:* H.H. Atkinson, M. Dibari\*, J. Allen, J. Stanfield, T. Delvalle-Fagan, L.J. Gordineer, L. Gordon, M. Gordon\*, S.L. Smith\*, H. Yates.\*

*Downtown Health Plaza, Winston-Salem, NC:* C.F. Pedley, G. Zurek, M. Baird, B. Dunn\*, W. Kinder\*, S. Mauney.

*University of North Carolina, Diabetes Care Center, Chapel Hill, NC:* J.B. Buse, M.D. Duclos, R.E. Kirby\*, J.F. Largay, N.M. McDermott\*, A. Goley, S.S. Braithwaite, J.M. Dostou, E.A. Fasy\*, D.C. Kelly\*, C.E. Metz\*, J. Jeffries, D. Rubin\*, K. Vukojcic.

*Holston Medical Group, Kingsport, TN:* J.L. Miller, W. Besterman, S.M. Norton\*, J. Weatherly\*, S. Bishop\*, B. Cross, K. Nuss\*, M. Surgenor\*, D. Alley\*, A. Farmer\*, J. Foard, J. White, Y. Wood\*, B. Gross.

*Carolinas Medical Center Family Practice, Charlotte, NC:* M. Dulin, J. Konen\*, T. Barringer\*, K. Andrews\*, C. Hoffman\*, C. Morris\*, S. Norton, P. Tochiki\*, G. Reinblatt\*, P. Bruner\*.

*Robeson Health Care Corporation, Fairmont Clinic, Fairmont, NC:* R. Peace, D.O. Stuart\*, J. Strickland, L. Cummings\*, D. Craig\*, J. Stanfield\*, J. Morgan\*.

*Robeson Health Care Corporation, Julian T. Pierce Clinic, Pembroke, NC:* R. Peace, D.O. Stuart\*, J. Strickland, L. Cummings\*, D. Craig\*, J. Stanfield\*, G. Williams\*.

*Wake Forest University School of Medicine, Departments of Internal Medicine and Endocrinology, Winston-Salem, NC:* J.R. Crouse, L. Menon, S. Marion\*, D. Davis\*, B. Cabrera\*, J. Calles, T. Chandler, J. Ellis, E. Kouba, P. Riddle, E. Myers\*.

*Tulane University Health Science Center, New Orleans, LA:* V. Fonseca, J. John-Kalarickal\*, R.H. McDuffie, N.O. Asafu-Adjaye, S.M. Leger, P. Reilly, G. Afner, F. Arrey\*, S. Asnani, E. Borshard\*, D. Boyd\*, A.Cemo, S. Chennur\*, P. Dupart, R. Garg\*, G.P. Girindra\*, B. Gouda\*, W. Itoua-N'Ganongo\*, I. Innocent-Ituah\*, C. Johnson\*, N. Kuhadiya, M. Kukreja\*, I. Mangan-Mbondi\*, S. Mason\*, C. McLain, J. Naylyanya\*, K. Nazereth\*, S. Nazereth\*, S. Singh, T. Thethi, K. Varnado\*, R. Williams\*.

*Kaiser Permanente, Clinic Atlanta Crescent Medical Center, Tucker, GA:* J.I. Barzilay, M. Eley\*, K. Bader, D. Curry-Ball, S. Goodman\*, M. Stevens.



*VA CCN: Memphis VAMC, Memphis, TN:* William C. Cushman, Therese S. Geraci, Sandra M. Walsh, Linda G. Coley, Marshall B. Elam, Diane I. Pickering\*, C.Huff.

***VA clinical sites:***

*Memphis VAMC, Hypertension/Lipid Research Clinic, Memphis, TN:* M.B. Elam, C.W. Thompson\*, L. Lichtermann, S. Peeples, J. Turner-Bates\*, M. Heimberg, D. Childress, J. Turner, J. Jasper\*, J. Coley.

*Baltimore VAMC, Baltimore, MD:* B.P. Hamilton, J. Hamilton, G. Kuzbida\*, W. Hatten, Jr, A. Lancaster, J. Haywood, J.Luck, D. Bannerman-Wood\*.

*Carl T. Hayden VAMC, Phoenix, AZ:* J. Felicetta, M. Bourne- Collo\*, M.E. Svoboda, D. Clothier\*, M. Deitz†, C. Flaughner\*, P. Hayward\*, T. Scheibe\*, S. Velarde, S. Heritage\*, J.P. Nelson, D. Heritage\*, C.Martinez\* .

*Atlanta VAMC Medical Service, Decatur, GA:* M.E. Sweeney, D. Harrelson\*, S. McConnell, F. Watson, R. Johnson, L. Whittington, M. Nanes, M. Salles, C Rice\*, C. Cowden\*.

*Ralph H. Johnson VAMC, Primary Care, Charleston, SC:* J. Basile, D.B. Ham, B. North-Lee\*, H.A. Baig, S.U. Rehman, J. Mixson, D Nelson\*.

*G. V. (Sonny) Montgomery VAMC, Research Department, Jackson, MS:* K.A. Kirchner, L.A. Hinton, L. Mack\*, C. Adair\*, B. James\*, A. Spencer, A. Jones.

*VA NY Harbor Healthcare System, New York, NY:* L. Katz, E.A. Richardson, A.G. Goldberg\*, A. Nieves\*, J.E. Russo\*, J. Adams\*, S.A. Sochalski\*, M.Coles\*, S. Anderson\*, M. Williams\*D. Hoffman†.

*Washington VAMC, Washington, DC:* V. Papademetriou, B. Gregory, R. Alignay\*, E. Nylen, B. Rajendran, R. Hodges, S. Amodeo, A. Ross\*, A. Notargiacomo\*, M. Metcalfe\*, P. Narayan\*, D. Wojackovski\*

*St. Louis VAMC, St. Louis, MO:* S. Giddings, E. Clark, A. Pittler, R. Davis\*, P. Harris, K. Waidmann, L. Conwill, S. Felton, A. Chen.

*Central Arkansas Clinic Healthcare System, Little Rock, AR:* D.L. Simmons, J.J. Cooper\*, K. Dishongh, R. Bates\*, K. Bhaghayath\*, P. Choksi\*, S. Conley\*, S. Elbein\*, F. Faas, Z. Hamid\*, J. Johnson, P. Johnson\*, A. Mayo\*, M.S. Moriarty\*, G. Nair\*, D. Rani\*, N. Rasouli\*, S. Said\*, N. Rassouli\*, M. Rodriguez\*, K. Thomas\*, K. Watson\*, D. Williams\*, A. Makdissi.

***Coordinating Center:*** *Wake Forest University School of Medicine, Winston-Salem, NC:* R.P. Byington, W.T. Ambrosius, R.T. Anderson\*, J. Barnes\*, J. Beal, C. Bell\*, D.E. Bonds\*, S. Burton,\* C. Collins, D. Cook\*, B. Craven\*, T. Craven, D. Dunbar\*, G. W. Evans, P. Feeney\*, C. D. Furberg, C. M. Greven, J. Griffin, L. Harvin, J. Hepler, L. Howard\*, L.T. Howard-Perdue, M. Hough, W. Hwang\*, A. Kimel, D. Lefkowitz, A. Lopina\*, J. Lovato, L.C. Lovato, M.E. Miller, D. Reboussin\*, S. Rushing, L. Sanders\*, L. Sims, C. Stowe\*, M. Walkup\*, S. Wilmoth, K. Wilson\*, N. Woolard.

**Drug Distribution Center:** *VA Cooperative Studies Program Clinical Research Pharmacy Coordinating Center, Albuquerque, NM:* D. Raisch, R. Ringer, M. Sather, B. DelCurto, D. Garnand.

**ECG Reading Center:** *Wake Forest University School of Medicine, Winston-Salem, NC:* R. Prineas\*, C. Campbell, Z. Zhang, L. Kesler, S. Hall\*, S. Hensley, Y. Li, E.Z. Soliman, D. Milne

**Central Chemistry Laboratory:** *Northwest Lipid Research Laboratories, Seattle, WA:* S. Marcovina, J. Chmielewski, K. Gadbois, V. Gaur, G. Strylewicz, M. Ramirez, S. Waddell, M. Mehan\*.

**ACCORD-MIND MRI Reading Center:** *University of Pennsylvania, Philadelphia, PA:* R.N. Bryan, C. Davatzkios, G. Moonis, L. Desiderio, S. D'Arcy\*.

**Fundus Photograph Reading Center:** *University of Wisconsin Medical School, Madison, WI:* M. Davis, R. Danis, S. Gangaputra, L. Hubbard, N. Robinson, J. Dingledine, D. Thayer, H. Wabers, M. Neider, B. Esser, T. Harding, R. Susman, C. Hurtenbach, V. Gama, M. Schiffman, S. Johnson\*, T. Graham\*

**Project Office:**

*National Heart, Lung, and Blood Institute (NHLBI), Bethesda, MD:* D.G. Simons-Morton, L. Cooper\*, M. Domanski, C. Nwachuku\*, Y. Rosenberg, M. Salive\*, P. Savage, J.L. Fleg, J.A. Cutler, N. Geller, D. Follmann\*, M. Proschan\*, C. Jennings, E. Schaeffer\*, P. Mills,\* J. Bittner\*, R. Kirby, P. Frommer†, L. Fine, J. Chan\*.

*National Institute of Diabetes and Digestive and Kidney Diseases (NIDDK), Bethesda, MD:* J. Fradkin, S. Malozowski, C. Meyers, T. Hostetter\*.

*National Institute on Aging (NIA), Bethesda, MD:* L. Launer.

*National Eye Institute (NEI), Bethesda, MD:* E.Y. Chew.

*Centers for Disease Control and Prevention (CDC), Atlanta, GA:* A. Albright, K.M.V. Narayan, M. Engelgau\*, P. Zhang.
